# Supplementary material
Source: PubMed Central journal article supplement (PMC1456939)
Supplement: 7601055s3.pdf [file 7601055s3.pdf]

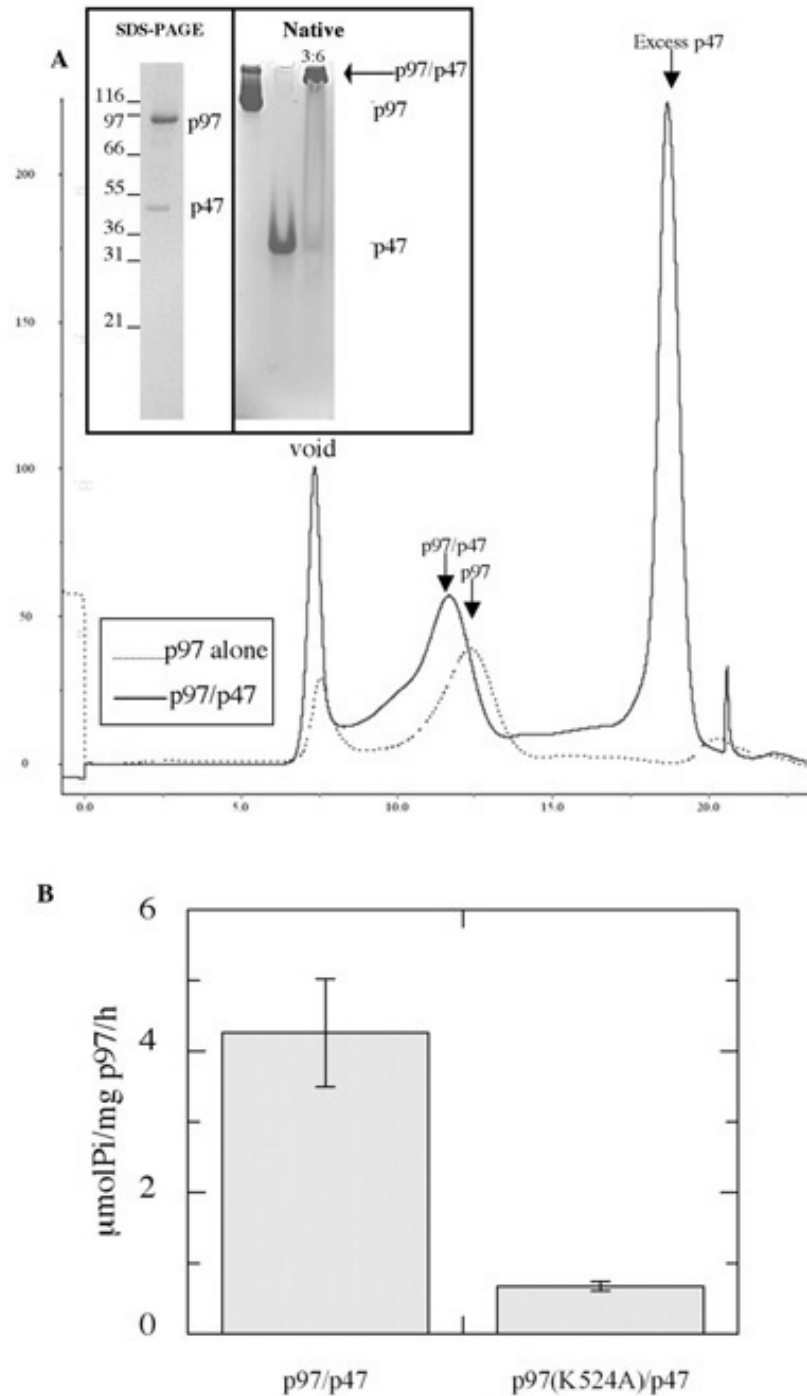

**Suppl. Figure 2.** Integrity and stoichiometry of the p97-p47 complex. (A) Gel-filtration of recombinant p97-p47 complex. The complex formed by mixing p97 and excess p47 is eluted as a single peak before p97 alone with excess p47 eluted later. Insert: Left, the peak fraction analysed by SDS-PAGE shows two bands for p97 and p47. Right, p47 incubated with p97 in a 3:6 molar ratio (lane marked 3:6) and subsequently analysed by native gel electrophoresis results in a single high molecular weight band above p97 alone.

(B) ATPase activity of the p97-p47 and p97(K524A)-p47 complexes. The mutation of the Walker A motif in p97(D2) domain abolishes ATPase activity.
